# Supplementary material
Source: PubMed Central journal article supplement (PMC3710668)

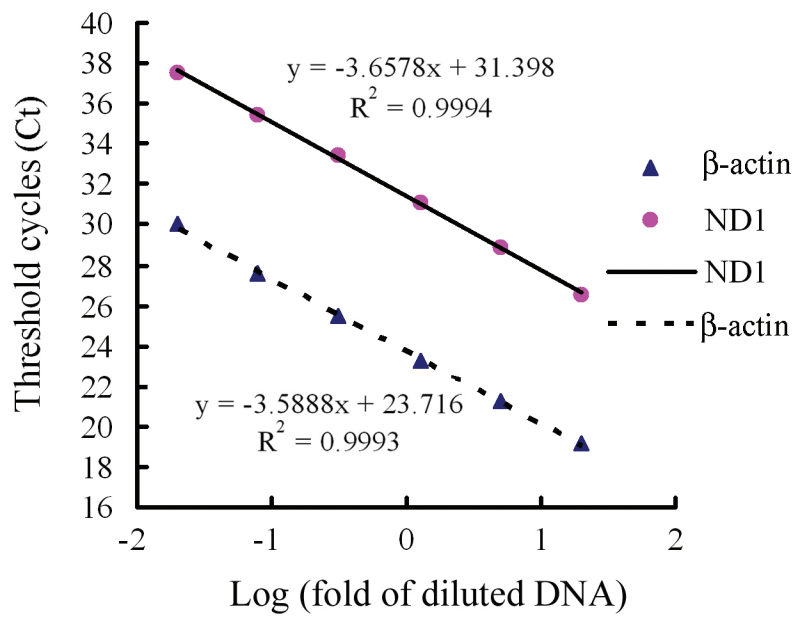

**Supplementary Figure 1**

Supplement: NIHMS487036-supplement-Supp_Fig1.pdf [file NIHMS487036-supplement-Supp_Fig1.pdf]

**A**

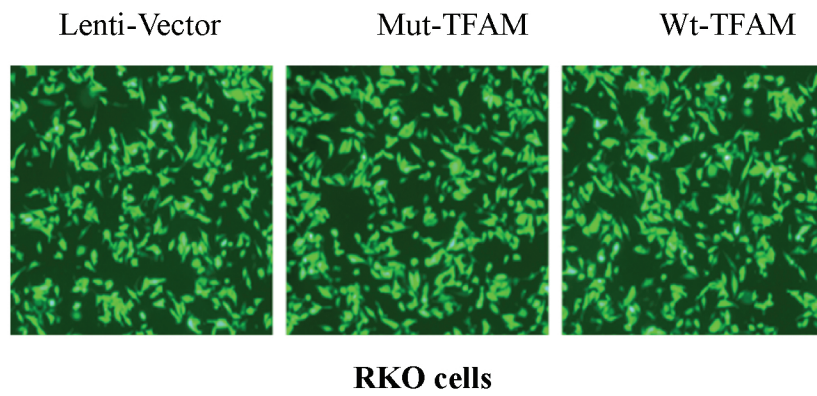

**B**

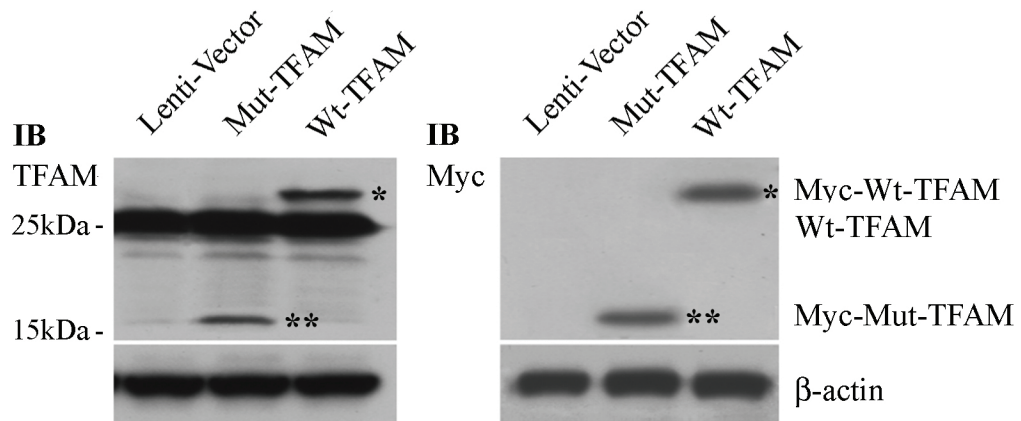

**Supplementary Figure 2**

Supplement: NIHMS487036-supplement-Supp_Fig2.pdf [file NIHMS487036-supplement-Supp_Fig2.pdf]
